# Supplementary material
Source: PubMed Central journal article supplement (PMC3785765)
Supplement: 1309697110_pnas.201309697SI.pdf [file 1309697110_pnas.201309697SI.pdf]

# Supporting Information

Neher et al. 10.1073/pnas.1309697110

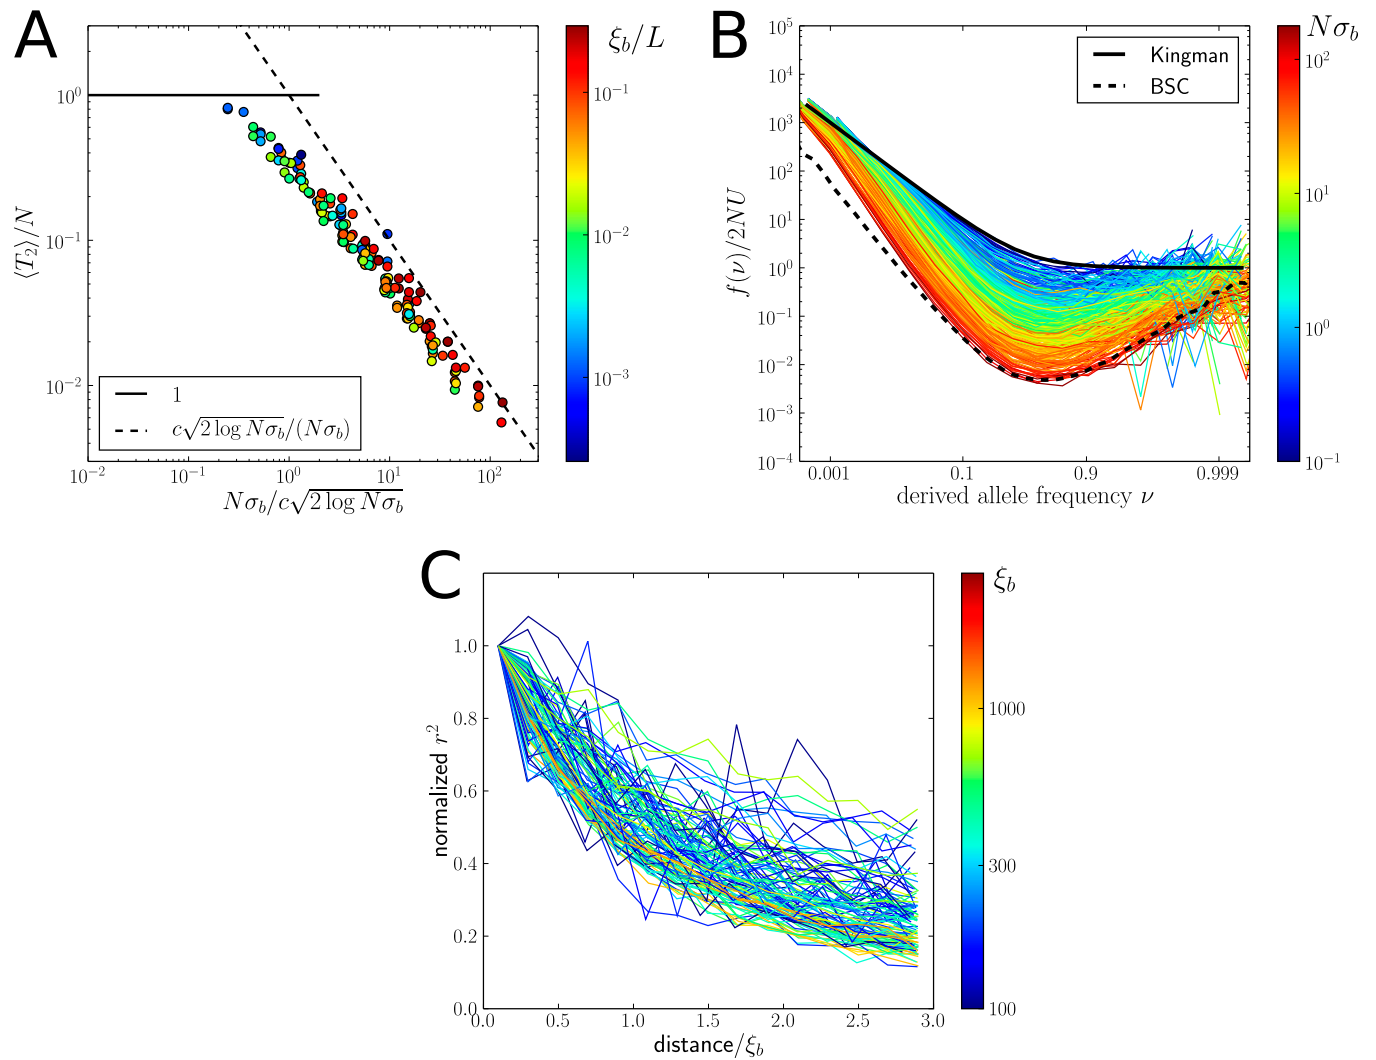

**Fig. S1.** Recurrent mutations with weak effects. Genetic diversity in populations with recurring mutations between a preferred and unpreferred state with weak effect is shown. (A) Pairwise coalescence time compared with the analytical predictions in the limits of large and small  $N\sigma_b$ . (B) Site frequency spectra (SFSs) normalized to  $\theta = 2N\mu$  (the SFSs are obtained from local coalescent trees). Different curves are colored by their respective  $N\sigma_b$  values. The Bolthausen-Sznitman coalescent (BSC) curve serves as a guide to the eye because its proper normalization depends on  $N\sigma_b$ . (C) Decay of linkage disequilibrium (LD) measured as  $r^2$  and normalized with its value at short distances. The x axis is rescaled by  $\xi_b$ . The resulting collapse demonstrates that LD extends over distances  $\xi_b$ . The grid of parameters used for simulations was  $L \in [3000, 10000]$ ,  $N \in [1000, 3000, 10000]$ ,  $s \in [-0.001, -0.003, -0.01]$ ,  $L\mu \in [1, 3, 10, 30]$ , and  $L\rho$  logarithmically spaced between  $s$  and 1.0. For the analysis, simulations were filtered such that  $\xi_b > 30$ ,  $\xi_b < L/3$ , and  $\langle T_2 \rangle \mu < 0.5$ .
